# Supplementary material
Source: HighWire-hosted journal article supplement (doi:10.1101/rna.079892.123)
Supplement: Supplemental_Figure_Legends.docx [file Supplemental_Figure_Legends.docx]

**Figure S1. Variant specific primer pairs fail to amplify the canonical U1 snRNA.** PCR reactions were performed using the plasmid pNS6U1-wildtype as a template and the products were separated on a 2% agarose gel. Sequences of primer pairs used for PCR are provided in Table S2.

**Figure S2. Variant U1 snRNAs are present at very low copy numbers in human cells.** Copy numbers of vU1 snRNAs were calculated using the observed relative expression levels from Figure 1 and a value of one million U1 snRNAs per cell for human cells (Baserga & Steitz, 1993; Steitz et al., 1988).
